# Supplementary material
Source: MDPI journal article supplement (https://www.mdpi.com/2077-1312/10/4/547)
Supplement: s1 [file s1 › jmse-1654144-supplementary.pdf]

## **Supplemental Materials**

### **An NMR-based metabolomics assessment of the effect of combinations of natural feed items in juvenile red drum, *Sciaenops ocellatus***

**Fabio Casu<sup>1,\*</sup>, David Klett<sup>1</sup>, Justin Yost<sup>1</sup>, Michael R. Denson<sup>2</sup> and Aaron M. Watson<sup>1,\*</sup>**

<sup>1</sup> South Carolina Department of Natural Resources, Marine Resources Research Institute, 217 Fort Johnson Road, Charleston, South Carolina 29412, USA

<sup>2</sup> National Oceanic and Atmospheric Administration, Hollings Marine Laboratory, 331 Fort Johnson Road, Charleston, South Carolina 29412, USA

**\* Correspondence:** CasuF@dnr.sc.gov (F.C); WatsonA@dnr.sc.gov (A.M.W.)

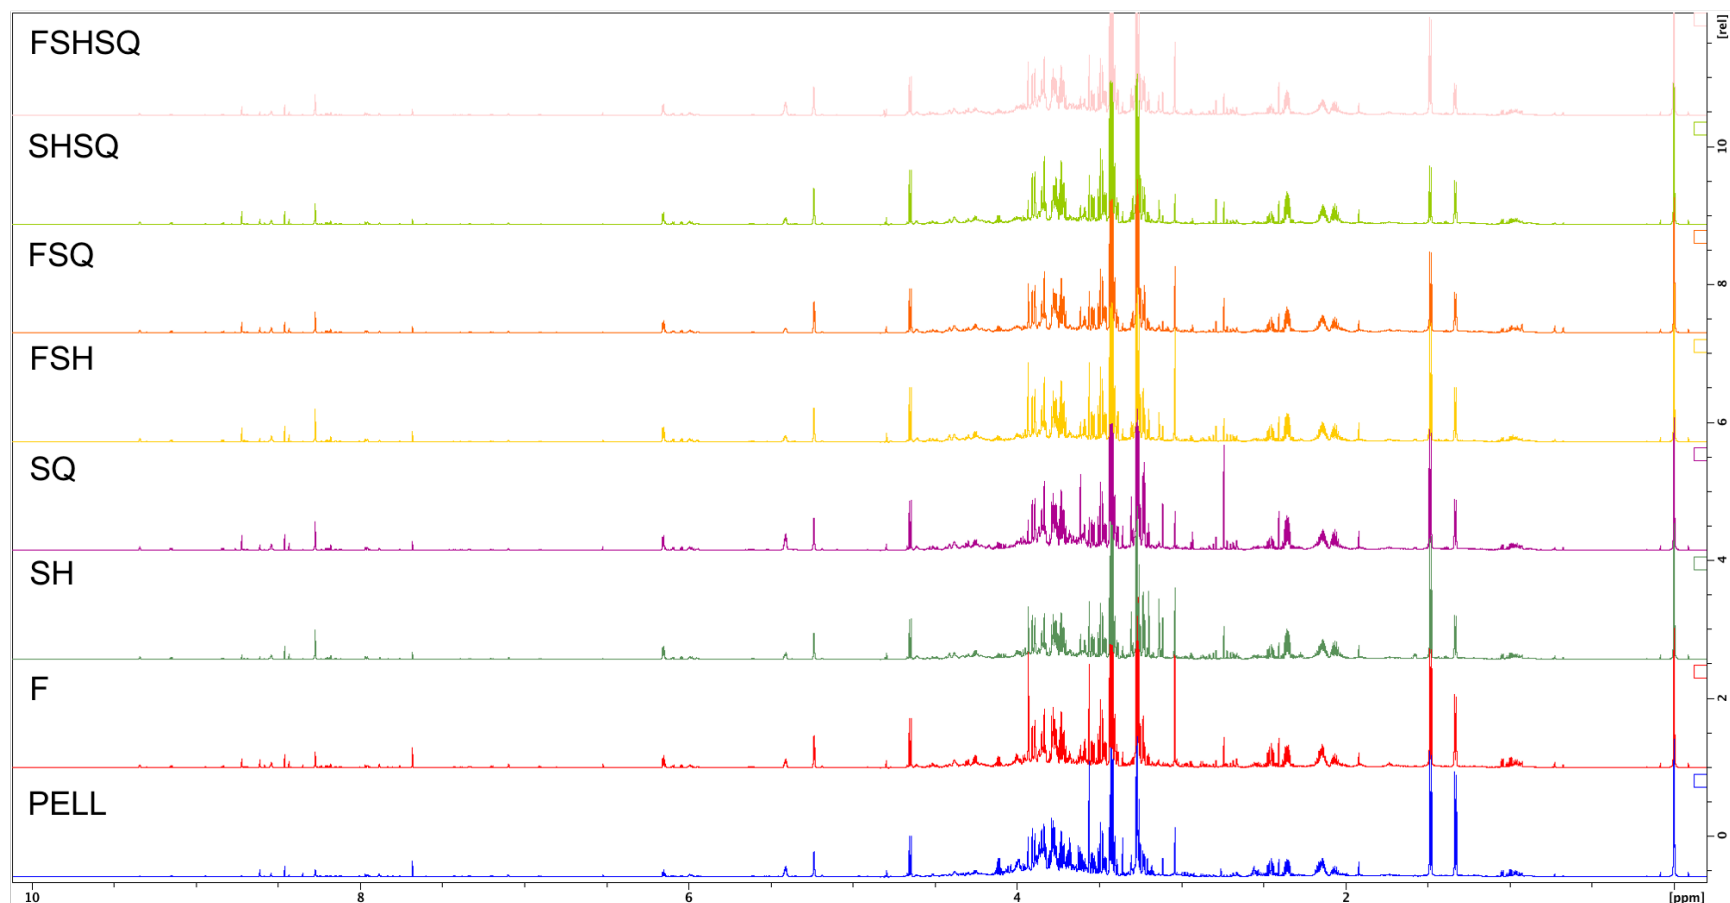

**Figure S1.** Representative 1D <sup>1</sup>H NMR spectra with water signal suppressed using the Bruker pulse sequence “noesygppld” of juvenile red drum liver extracts for fish fed the 7 experimental diets and the commercial pelleted diet. Spectra were acquired using a 700 MHz Bruker NMR spectrometer at 298K. Solvent: D<sub>2</sub>O. Chemical shift reference: TMSP. PEL, pelleted commercial fishmeal-based diet; F, fish diet; SH, shrimp diet; SQ, squid diet; FSH, fish + shrimp diet; FSQ, fish + squid diet; SHSQ, shrimp + squid diet; FSHSQ, fish + shrimp + squid diet.

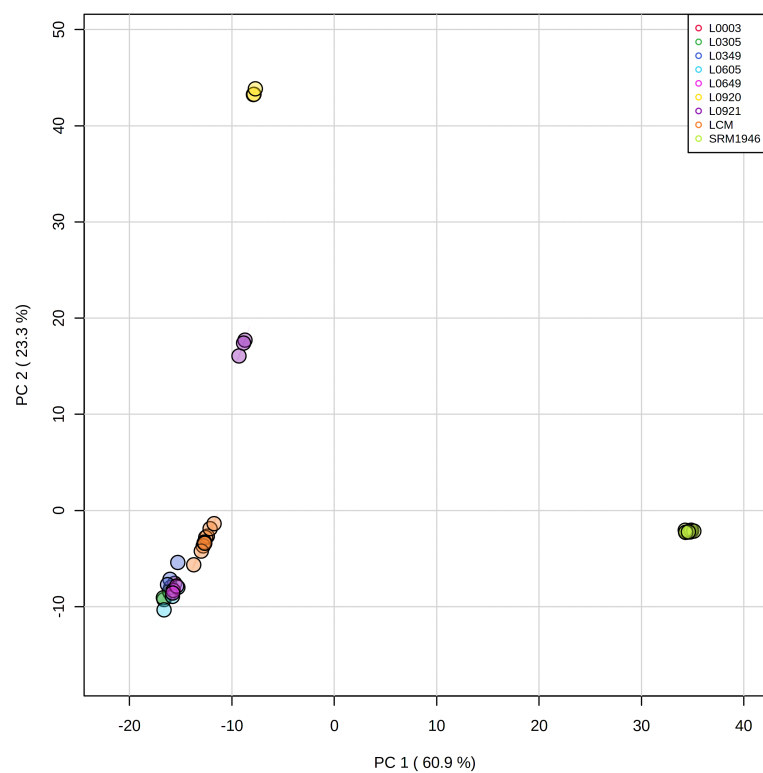

**Figure S2.** Liver QC samples PCA score plot. LCM, liver control material (orange circles; n=12; RSD=7.3%); NIST SRM 1946, standard reference material (light green circles; n=12; RSD=6.7%). Technical replicate samples (n=3/sample) are labeled with their respective sample IDs.

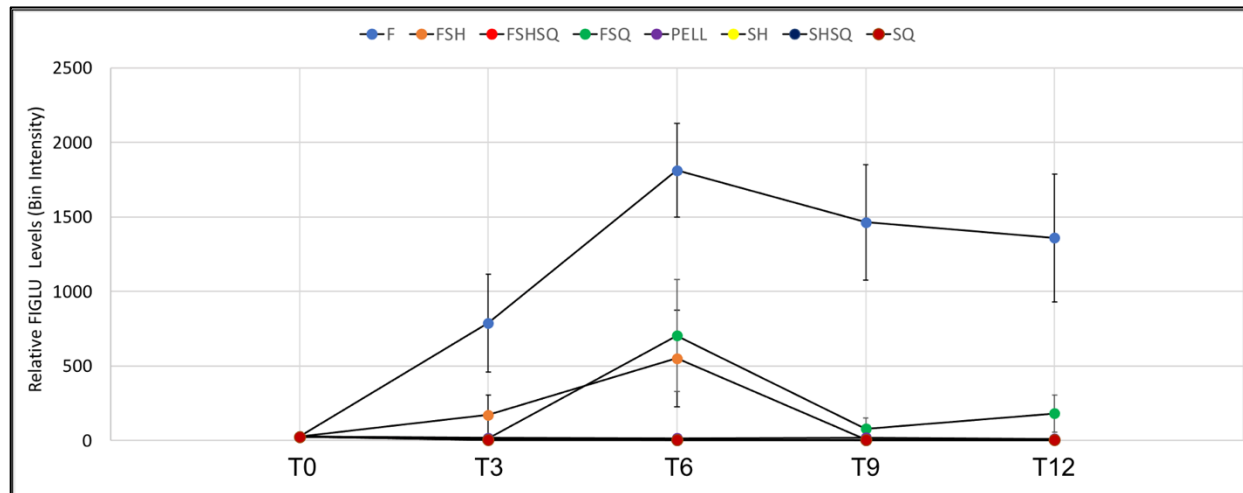

**Figure S3.** Relative hepatic FIGLU levels (bin intensity, 7.83 ppm) measured over the course of the 12-week juvenile red drum feeding trial at T0, T3, T6, T9 and T12. Each data point represents the mean  $\pm$  SEM ( $n=12$ , T0;  $n=9$ , T3, T6, T9, T12). FIGLU, N-formimino-L-glutamate. F, fish diet; FSH, fish + shrimp diet; FSHSQ, fish + shrimp + squid diet; FSQ, fish + squid diet; PELL, pelleted commercial fishmeal-based diet; SH, shrimp diet; SHSQ, shrimp + squid diet; SQ, squid diet.

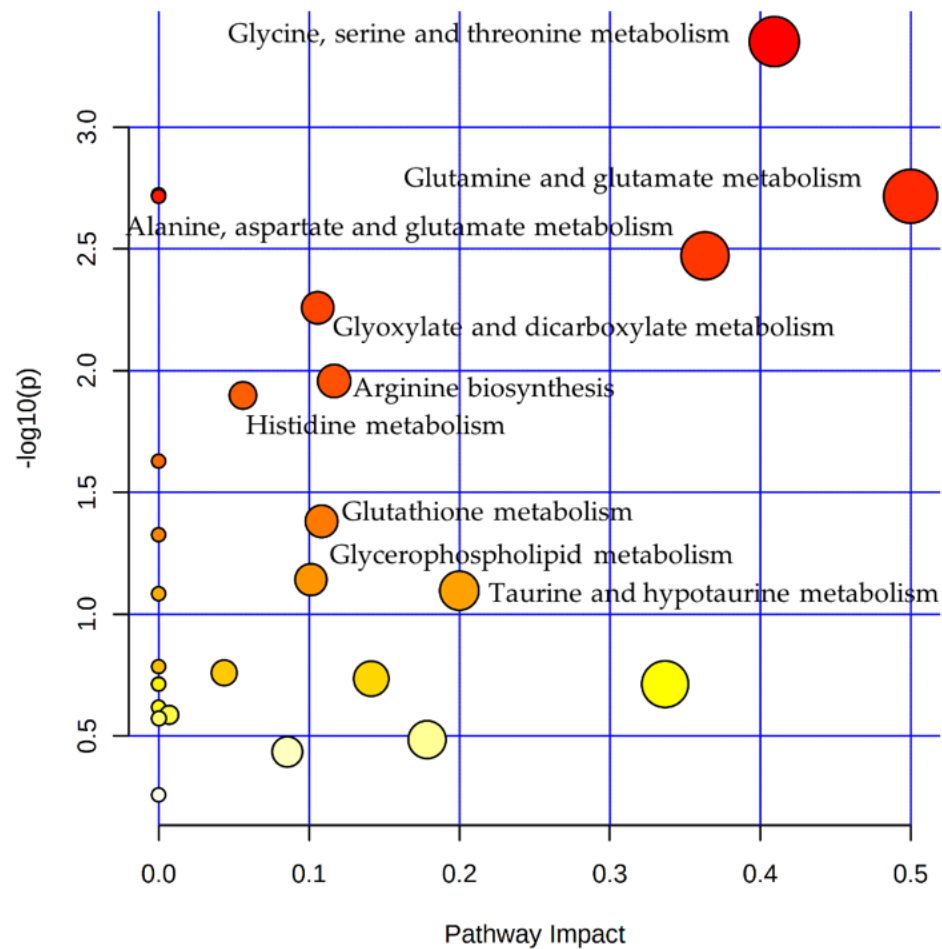

**Figure S4.** Metabolomic pathway analysis overview showing the metabolic pathways that are mostly impacted by the different dietary treatments. The diameter of the circles (nodes) indicates the pathway impact; the color of the nodes is graded from white to red with increasing  $p$  value derived from enrichment analysis.
